# Supplementary material for: Active demethylation in mouse zygotes involves cytosine deamination and base excision repair
Source: PubMed Central journal article supplement (PMC4037648; doi:10.1186/1756-8935-6-39), 2013-11-14

A

B6xB6

Group 1 (superovulation; 2010) – N= 41  
 Group 2 (natural mating; 2011) - N= 21  
 Group 3 (superovulation; 2012) - N= 24  
 Group 4 (superovulation and culture; 2013) - N= 13

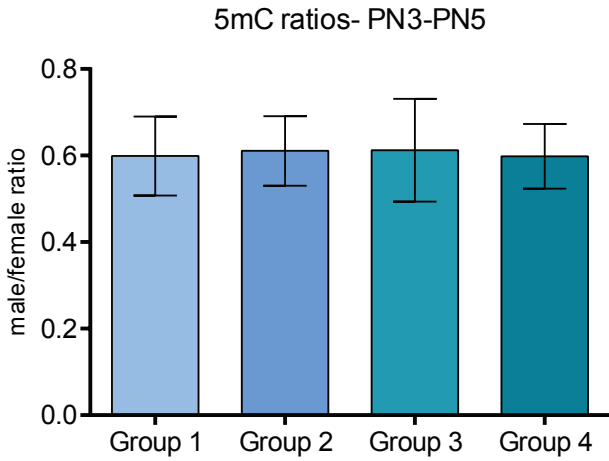

ANOVA P= 0.931

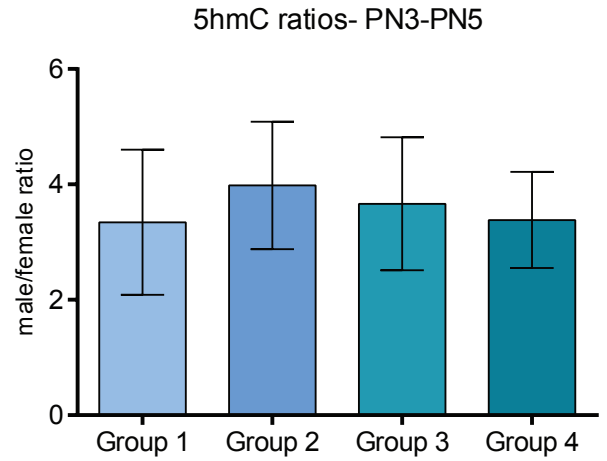

ANOVA P= 0.2017

B

E14- serum: 764 cells  
 E14- 2i: 760 cells

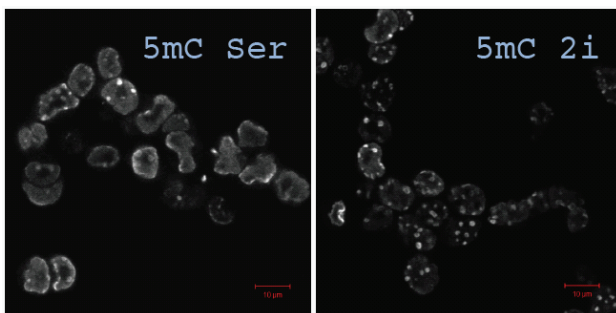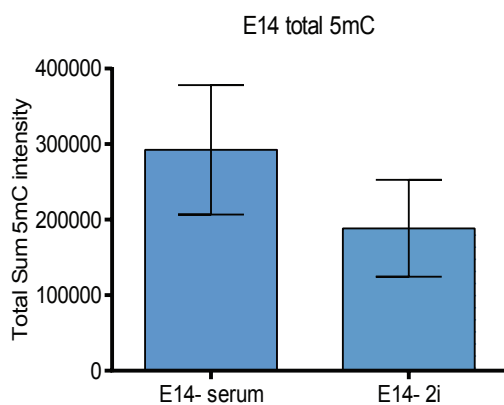

Mann-Whitney U: P< 0.0001

Mass spectrometry measurement of global 5mC  
 Ficiz et al. 2013

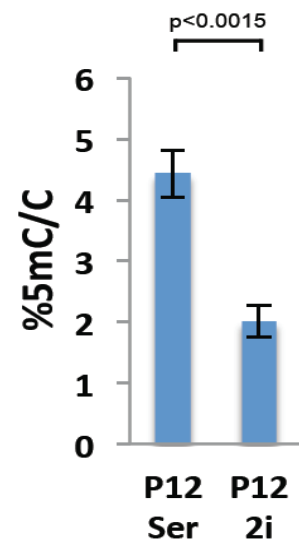

Supplement: 1756-8935-6-39-S2.pdf [file 1756-8935-6-39-S2.pdf]
