# Supplementary material for: Active demethylation in mouse zygotes involves cytosine deamination and base excision repair
Source: PubMed Central journal article supplement (PMC4037648; doi:10.1186/1756-8935-6-39), 2013-11-14
Supplement: 1756-8935-6-39-S3.pdf [file 1756-8935-6-39-S3.pdf]

A

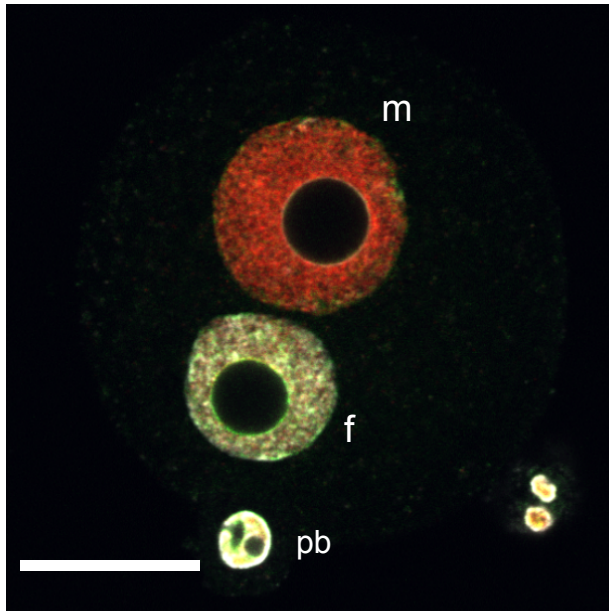

Control (DMSO)

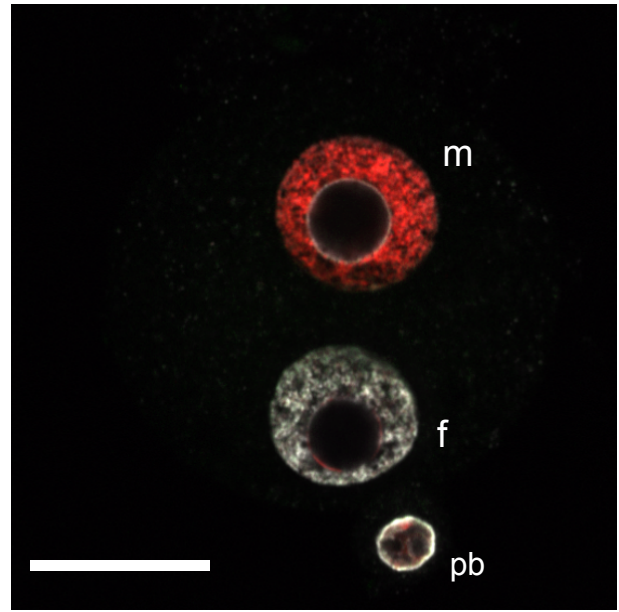

Aphidicolin

B

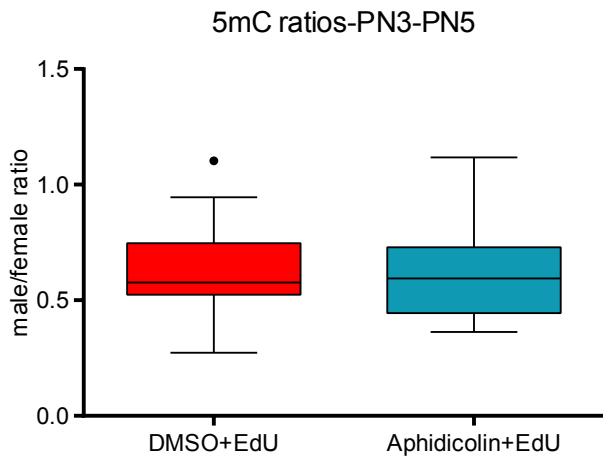

Unpaired t test  $P = 0.7842$

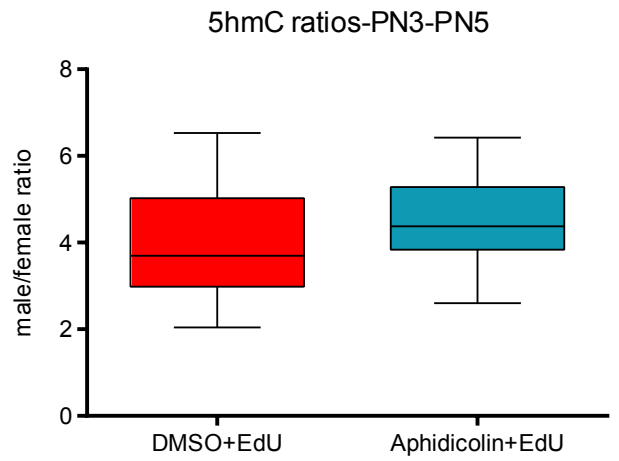

Unpaired t test  $P = 0.0748$
