# Supplementary material for: Active demethylation in mouse zygotes involves cytosine deamination and base excision repair
Source: PubMed Central journal article supplement (PMC4037648; doi:10.1186/1756-8935-6-39), 2013-11-14

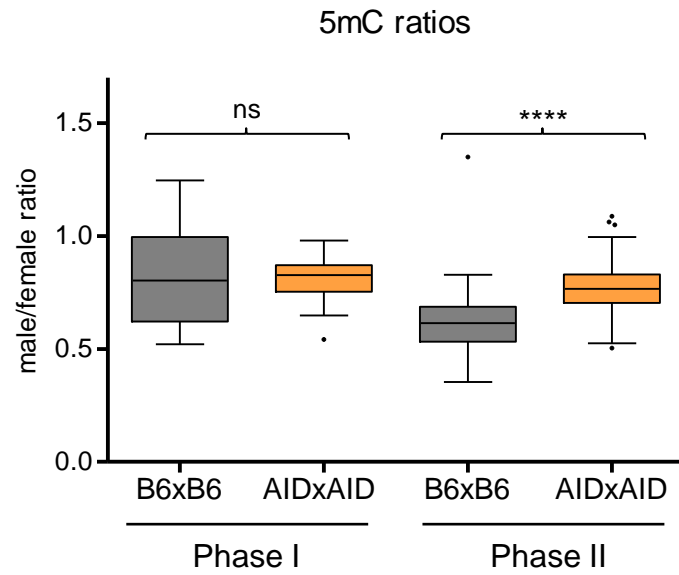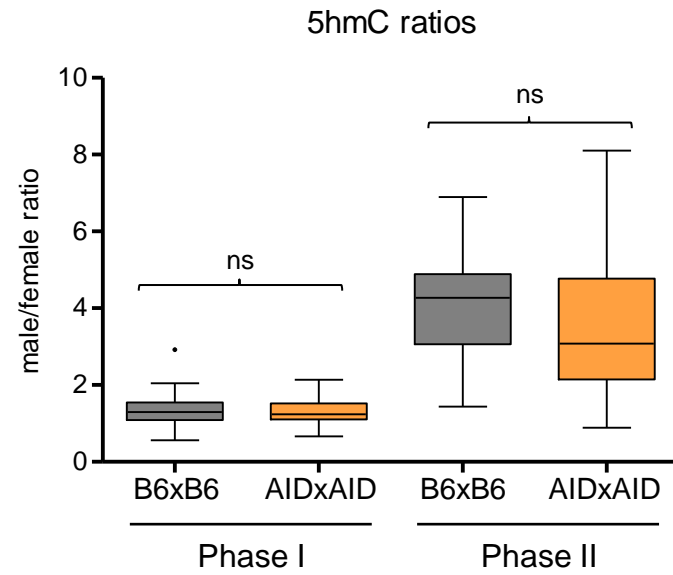

Supplement: 1756-8935-6-39-S5.pdf [file 1756-8935-6-39-S5.pdf]
