# Supplementary material for: Active demethylation in mouse zygotes involves cytosine deamination and base excision repair
Source: PubMed Central journal article supplement (PMC4037648; doi:10.1186/1756-8935-6-39), 2013-11-14

A

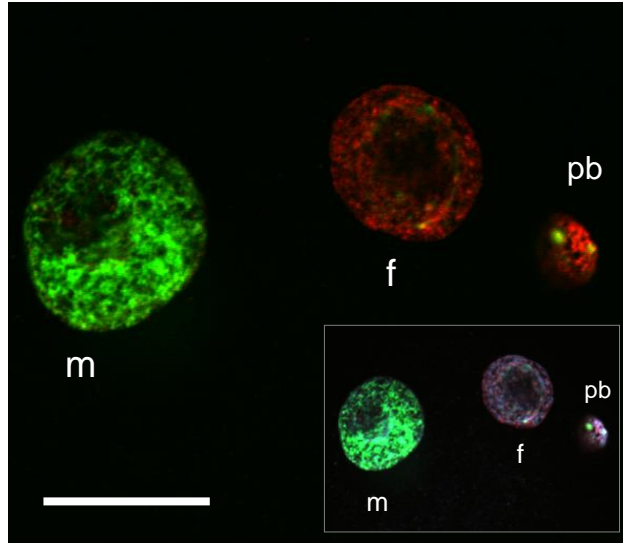

B6xB6

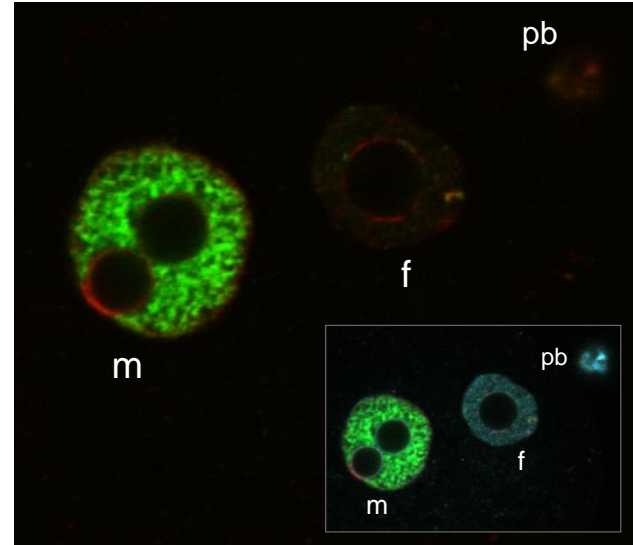

Dnmt3a MAT KOxB6

B

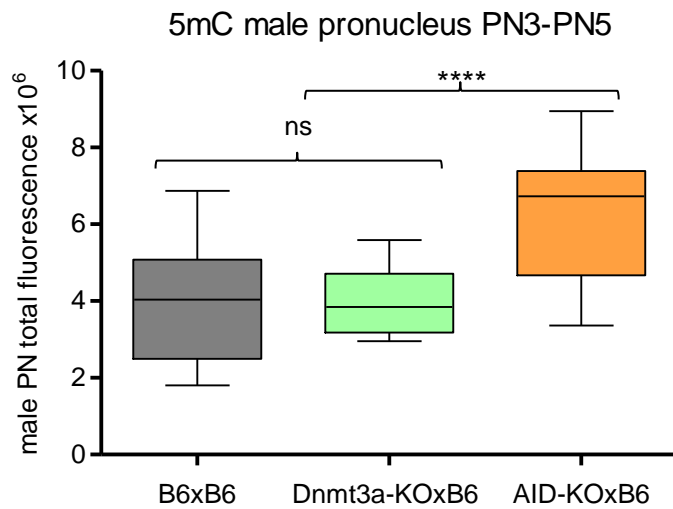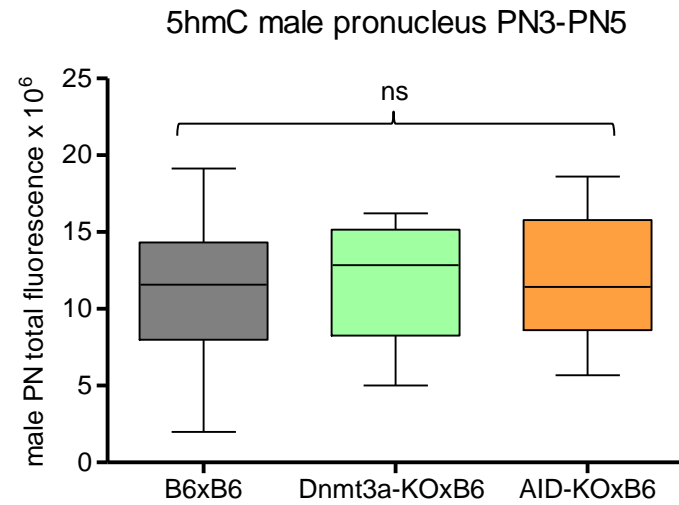

Supplement: 1756-8935-6-39-S7.pdf [file 1756-8935-6-39-S7.pdf]
